# Supplementary material for: Novel electrochemiluminescent materials for sensor applications
Source: Royal Society of Chemistry journal article supplement (doi:10.1039/c4fd00090k), 2014-01-01
Supplement: c4fd00090k1.pdf [file c4fd00090k1.pdf]

## Novel Electrochemiluminescent Materials for Sensor Applications

Lynn Dennany,\* Zahera Mohsan, Alexander L. Kanibolotsky and Peter J. Skabara  
DOI: 10.1039/b000000x [DO NOT ALTER/DELETE THIS TEXT]

Supplementary Material

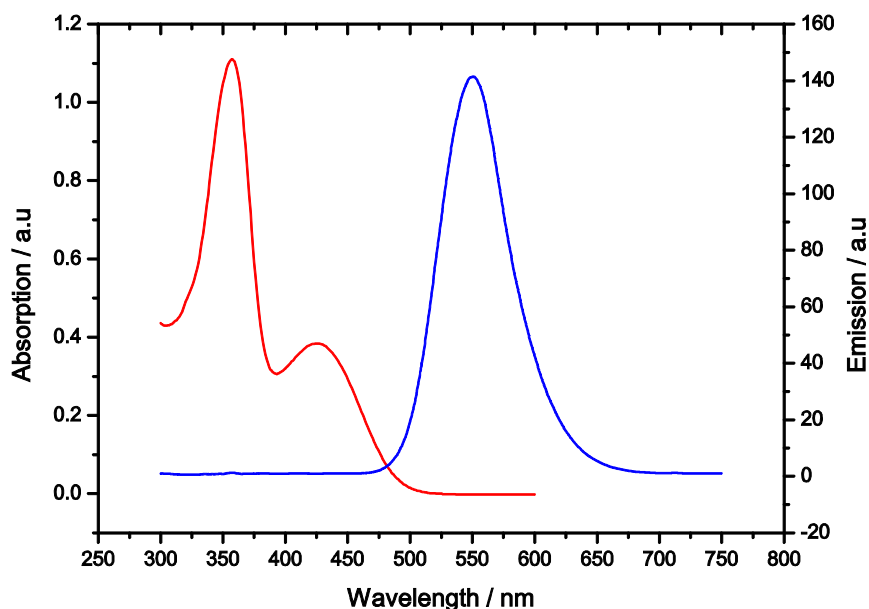

**Figure S1.** Normalized absorption (red line) and normalized fluorescence (blue line) spectra of T4BT-B in solvent 1:2 MeCN/Bz. The excitation wavelength for T4BT-B was 357 nm.

**Table S1.** Comparison of Electrochemical and Spectroscopic data of T4BT-B with DPA

|               | Emission,<br>$\lambda_{\max}$ (nm) | Absorption,<br>$\lambda_{\max}$ (nm) | Optical<br>HOMO-LUMO<br>gap, $E_g$ (eV) | Electrochemical<br>HOMO-LUMO gap,<br>$E_g$ (eV) | ECL,<br>$\lambda_{\max}$ (nm) | ECL efficiency<br>$\Phi_{\text{ECL}}$ (%) |
|---------------|------------------------------------|--------------------------------------|-----------------------------------------|-------------------------------------------------|-------------------------------|-------------------------------------------|
| <b>T4BT-B</b> | 551                                | 357                                  | 2.52                                    | 2.58                                            | 564                           | 59.9                                      |
